# Supplementary material
Source: PubMed Central journal article supplement (PMC170917)

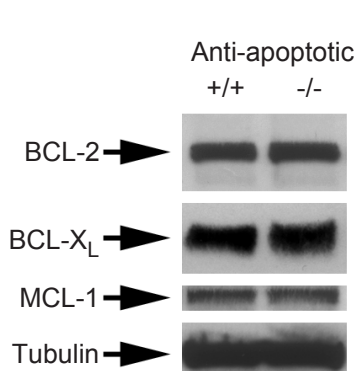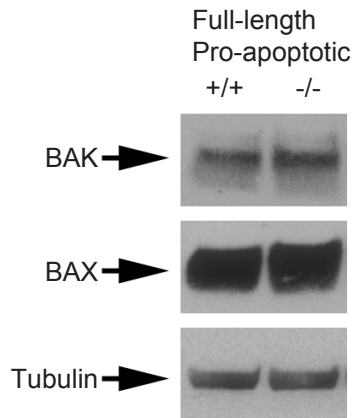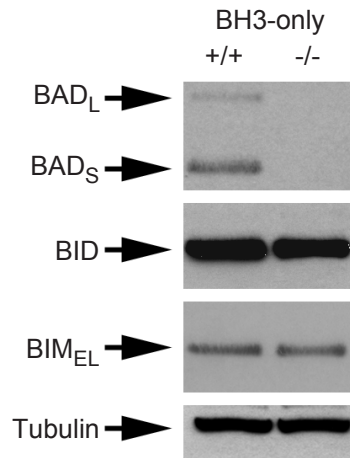

Supplement: pnas_1533446100_3.pdf [file pnas_1533446100_3.pdf]

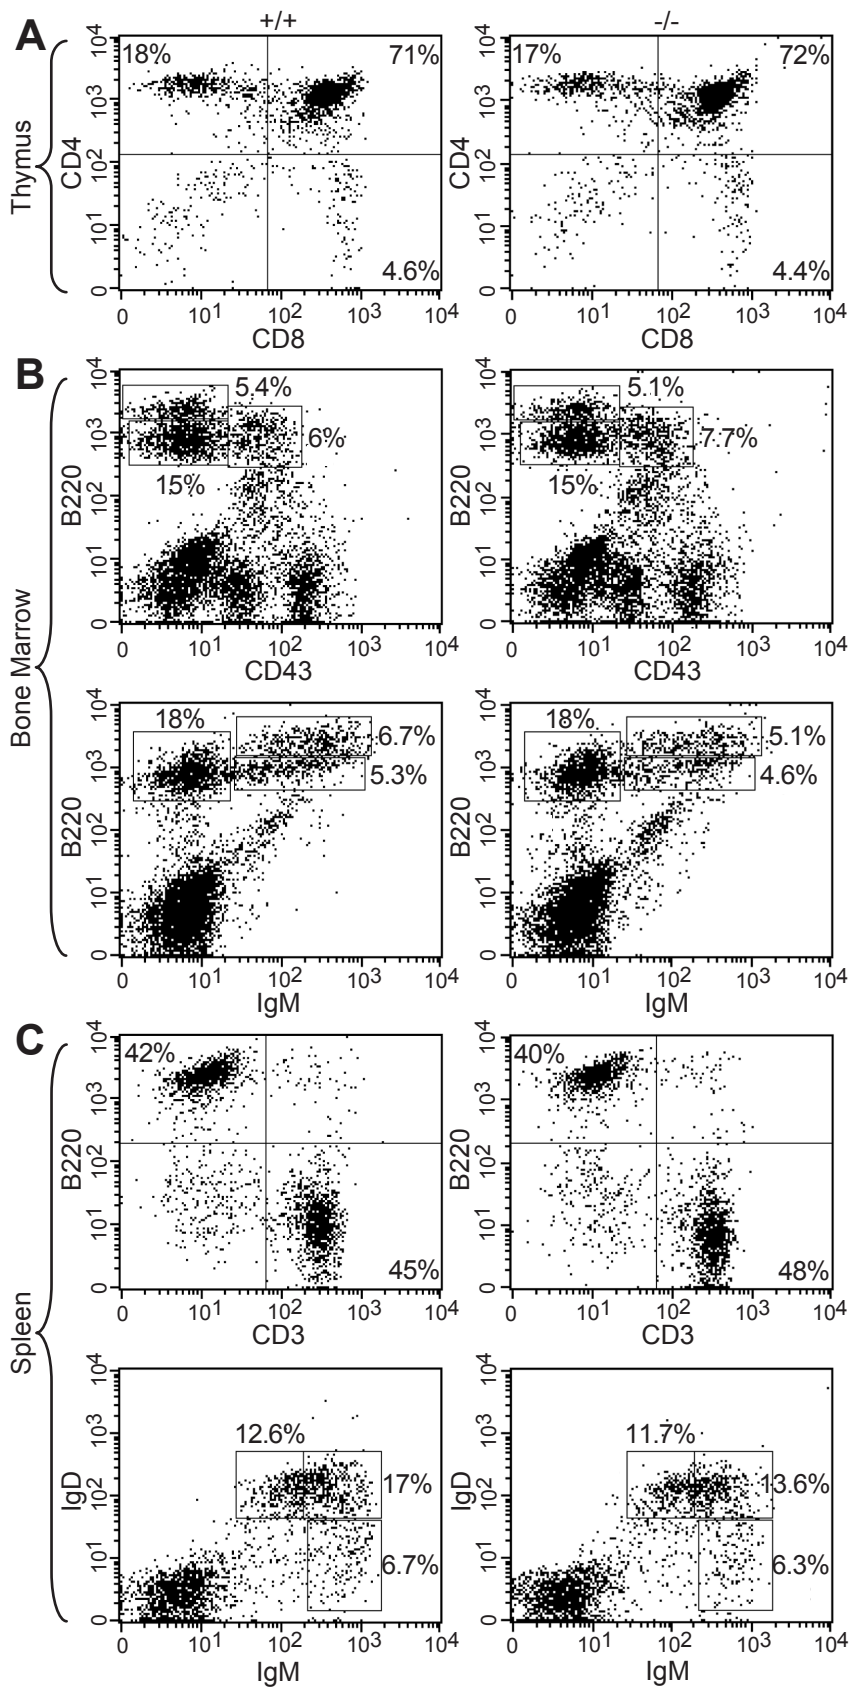

Supplement: pnas_1533446100_7.pdf [file pnas_1533446100_7.pdf]
